# Supplementary material
Source: MDPI journal article supplement (https://www.mdpi.com/2078-2489/11/10/475)
Supplement: s1 [file s1]

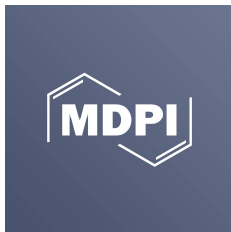

## Future Internet— Change of Authorship Form

(Must be Completed and Signed by ALL Authors)

Manuscript ID: **information-904104**

Manuscript Title: (Automated Seeded Latent Dirichlet Allocation for Social Media Based Event Detection and Mapping)

### Original Authorship

LIST ALL AUTHORS in the same order as the original (first) submission. For more than 10 use an extra sheet.

|          | Print Name    |           | Print Name |
|----------|---------------|-----------|------------|
| Name (1) | Shuai You     | Name (6)  | Fei Wu     |
| Name (2) | Yimu Ji       | Name (7)  |            |
| Name (3) | Shangdong Liu | Name (8)  |            |
| Name (4) | Qiang Bi      | Name (9)  |            |
| Name (5) | Yujian Feng   | Name (10) |            |

### New Authorship

All authors must sign below agreeing to the new changes in authorship. The authorship order must match the new title page of the manuscript. Signatures below certify compliance with the author responsibilities on the next page. List ALL AUTHORS in the same order as the new version.

|            | name          | affiliation                                                                                                            | Signature & Date     |
|------------|---------------|------------------------------------------------------------------------------------------------------------------------|----------------------|
| author (1) | Shuai You     | Institute of High Performance Computing and Bigdata, Nanjing University of Posts and Telecommunications, Nanjing210023 | <i>Shuai You</i>     |
| author (2) | Qiang Bi      | Institute of High Performance Computing and Bigdata, Nanjing University of Posts and Telecommunications, Nanjing210023 | <i>Qiang Bi</i>      |
| author (3) | Yimu Ji       | Institute of High Performance Computing and Bigdata, Nanjing University of Posts and Telecommunications, Nanjing210023 | <i>Yimu Ji</i>       |
| author (4) | Shangdong Liu | Institute of High Performance Computing and Bigdata, Nanjing University of Posts and Telecommunications, Nanjing210023 | <i>Shangdong Liu</i> |

|             |             |                                                                                                                        |             |
|-------------|-------------|------------------------------------------------------------------------------------------------------------------------|-------------|
| author (5)  | Yujian Feng | Institute of High Performance Computing and Bigdata, Nanjing University of Posts and Telecommunications, Nanjing210023 | Yujian Feng |
| author (6)  | Fei Wu      | Institute of High Performance Computing and Bigdata, Nanjing University of Posts and Telecommunications, Nanjing210023 | Fei Wu      |
| author (7)  |             |                                                                                                                        |             |
| author (8)  |             |                                                                                                                        |             |
| author (9)  |             |                                                                                                                        |             |
| author (10) |             |                                                                                                                        |             |

Please list all the author's Contribution here:

|                                                                                                                                  |
|----------------------------------------------------------------------------------------------------------------------------------|
| Author's Contribution                                                                                                            |
| author (1) Conceptualization; methodology; software; validation; writing—original draft preparation; writing—review and editing. |
| author (2) methodology; software; validation; writing—original draft preparation; writing—review and editing.                    |
| author (3) Conceptualization; writing—review and editing; supervision; project administration; funding acquisition.              |
| author (4) Conceptualization; writing—review and editing; supervision; project administration; funding acquisition.              |
| author (5) software; validation; writing—review and editing                                                                      |
| author (6) Conceptualization; supervision;                                                                                       |
| author (7)                                                                                                                       |
| author (8)                                                                                                                       |
| author (9)                                                                                                                       |
| author (10)                                                                                                                      |
